# Supplementary material for: A pro-inflammatory signalome is constitutively activated by C33Y mutant TNF receptor 1 in TNF receptor-associated periodic syndrome (TRAPS)
Source: PubMed Central journal article supplement — Eur J Immunol. 2014 Jun 10;44(7):2096–110. doi: 10.1002/eji.201344328 (PMC4285816; doi:10.1002/eji.201344328), 2014-06-10
Supplement: eji0044-2096-SD1.pdf [file eji0044-2096-SD1.pdf]

# European Journal of Immunology

Supporting Information  
for

**DOI 10.1002/eji.201344328**

Ola H. Negm, Heiko A. Mannsperger, Elizabeth M. McDermott, Elizabeth Drewe,  
Richard J. Powell, Ian Todd, Lucy C. Fairclough and Patrick J. Tighe

**A pro-inflammatory signalome is constitutively activated by C33Y mutant TNF  
receptor 1 in TNF receptor-associated periodic syndrome (TRAPS)**

Table 2: Statistical analysis of RPPA data from figure 3

|                                   | p value for significance comparisons |                        |                                              |            |               |               |               |               |
|-----------------------------------|--------------------------------------|------------------------|----------------------------------------------|------------|---------------|---------------|---------------|---------------|
| Target                            | Effect of time                       | effect: WT vs Mutation | TNF alpha incubation period (minutes)        |            |               |               |               |               |
|                                   |                                      |                        | 0                                            | 10         | 20            | 30            | 40            | 50            |
| phospho-HSP27 (Fig 3C)            | < 0.0001                             | < 0.0001               | P < 0.0001                                   | P < 0.0001 | P < 0.0001    | P < 0.0001    | P < 0.0001    | P < 0.0001    |
| TRAF2 (Fig 3D)                    | 0.1513 (ns)                          | 0.0102                 | P < 0.01                                     | P < 0.05   | P > 0.05 (ns) |
|                                   |                                      |                        | Chase period after TNF alpha pulse (minutes) |            |               |               |               |               |
|                                   | Effect of chase time                 | Effect: WT vs Mutation | 0                                            | 20         | 40            | 60            | 80            | 100           |
| phospho-AKT-ser (Fig 3E)          | 0.0003                               | < 0.0001               | P < 0.01                                     | P < 0.0001 | P < 0.0001    | P < 0.0001    | P < 0.0001    | P < 0.0001    |
| phospho-C-RAF (fig3F)             | < 0.0001                             | < 0.0001               | P < 0.0001                                   | P < 0.0001 | P < 0.0001    | P < 0.0001    | P > 0.05 (ns) | P > 0.05 (ns) |
| phospho-GSK-3 $\beta$<br>(Fig 3G) | < 0.0001                             | < 0.0001               | P < 0.0001                                   | P < 0.0001 | P < 0.0001    | P < 0.0001    | P < 0.05      | P < 0.05      |
| phospho-HSP27 (Fig 3H)            | < 0.0001                             | < 0.0001               | P < 0.0001                                   | P < 0.0001 | P < 0.0001    | P < 0.0001    | P < 0.0001    | P < 0.0001    |
|                                   |                                      |                        | TNF alpha concentration (ng/ml)              |            |               |               |               |               |
|                                   | Effect of TNF alpha                  | Effect: WT vs Mutation | 0                                            | 10         | 20            | 30            | 40            | 50            |
| phospho-PTEN (Fig 3I)             | 0.0012                               | < 0.0001               | P < 0.01                                     | P < 0.05   | P > 0.05 (ns) | P > 0.05 (ns) | P < 0.01      | P < 0.001     |
| STAT3 (Fig 3J)                    | 0.0376 (ns)                          | < 0.0001               | P < 0.01                                     | P < 0.0001 | P < 0.001     | P < 0.0001    | P < 0.0001    | P < 0.0001    |
| phospho-STAT3 (Fig 3K)            | 0.0502 (ns)                          | < 0.0001               | P < 0.0001                                   | P < 0.0001 | P < 0.0001    | P < 0.0001    | P < 0.0001    | P < 0.0001    |
| phospho-HSP27 (Fig 3L)            | < 0.0001                             | < 0.0001               | P < 0.0001                                   | P < 0.0001 | P < 0.0001    | P < 0.0001    | P < 0.0001    | P < 0.0001    |
| PI3K P110 (Fig 3M)                | 0.8802 (ns)                          | < 0.0001               | P < 0.0001                                   | P < 0.0001 | P < 0.0001    | P < 0.0001    | P < 0.0001    | P < 0.0001    |
| c-FLIP (Fig 3N)                   | < 0.0001                             | < 0.0001               | P < 0.0001                                   | P < 0.0001 | P < 0.05      | P < 0.0001    | P < 0.0001    | P < 0.0001    |

Table 3: Statistical analysis of RPPA data from figure 4

|                            | p value for significance comparisons |                          |                                       |               |               |               |               |               |
|----------------------------|--------------------------------------|--------------------------|---------------------------------------|---------------|---------------|---------------|---------------|---------------|
| Target                     | Effect over time                     | effect of wt vs Mutation | TNF alpha incubation period (minutes) |               |               |               |               |               |
|                            |                                      |                          | 0                                     | 10            | 20            | 30            | 40            | 50            |
| NFkB P65 (Fig 4G)          | 0.0069                               | < 0.0001                 | P < 0.01                              | P < 0.01      | P > 0.05 (ns) |
| IkB alpha (Fig 4H)         | 0.0162                               | < 0.0001                 | P < 0.01                              | P < 0.001     | P < 0.001     | P < 0.01      | P < 0.05      | P < 0.0001    |
| phospho-P65 (Fig 4I)       | 0.2514 (ns)                          | < 0.0001                 | P > 0.05 (ns)                         | P > 0.05 (ns) | P < 0.01      | P < 0.05      | P > 0.05 (ns) | P > 0.05 (ns) |
| p-C-Jun (Fig 4J)           | 0.3225 (ns)                          | < 0.0001                 | P > 0.05 (ns)                         | P < 0.001     | P < 0.05      | P > 0.05 (ns) | P > 0.05 (ns) | P < 0.01      |
| NFkB P50 (Fig 4K)          | < 0.0001                             | < 0.0001                 | P > 0.05 (ns)                         | P < 0.0001    | P < 0.01      | P > 0.05 (ns) | P > 0.05 (ns) | P < 0.01      |
| phospho-ELK (Fig 4 L)      | 0.409 (ns)                           | < 0.0001                 | P < 0.001                             | P < 0.0001    | P < 0.0001    | P < 0.0001    | P < 0.05      | P < 0.001     |
| IKK alpha (Fig 4M)         | 0.1639 (ns)                          | < 0.0001                 | P < 0.0001                            | P < 0.0001    | P < 0.001     | P < 0.05      | P > 0.05 (ns) | P < 0.0001    |
| phospho-ATF (Fig 4N)       | 0.2430 (ns)                          | < 0.0001                 | P > 0.05 (ns)                         | P < 0.01      | P < 0.0001    | P < 0.05      | P > 0.05 (ns) | P < 0.05      |
| IKK beta (Fig 4O)          | 0.8416 (ns)                          | < 0.0001                 | P < 0.01                              | P < 0.05      | P < 0.001     | P > 0.05 (ns) | P > 0.05 (ns) | P < 0.01      |
| phospho-IkB alpha (Fig 4P) | 0.0012                               | < 0.0001                 | P < 0.01                              | P < 0.001     | P < 0.05      | P < 0.05      | P < 0.01      | P < 0.0001    |
